# Supplementary material
Source: PubMed Central journal article supplement (PMC8946663)
Supplement: irab221_suppl_supplementary_data.pdf [file irab221_suppl_supplementary_data.pdf]

**PERMISSION TO USE THE CLINICAL FRAILTY SCALE (CFS)**

The undersigned is granted permission to use, reproduce and distribute the Clinical Frailty Scale (CFS), developed by Dr. Kenneth Rockwood, in the format attached<sup>1</sup> for educational purposes and for non-commercially funded research and/or quality assurance projects. The CFS must be administered free of charge to patients and/or study participants. A formal Licensing Agreement is required for research funded by any commercial entity or pharma and, in some cases, for use in routine clinical care. The copyright holder reserves the right to prospectively follow-up at any time to determine whether use of the CFS meets the conditions described above. Reselling of the CFS or other commercial development without a license agreement is prohibited by copyright. The undersigned, their delegates and affiliated organization(s) agree that they will not claim ownership rights to the CFS, or any derivative, including translations, compilation, sequel or series. Nothing in this Agreement shall give the undersigned any right, title, or interest in the CFS other than the right to use in accordance with this Agreement. The CFS will not be modified unless explicit permission is granted.

| <b>USER INFORMATION:</b>                                                                                                                                                                                                                                                     |                                                                                                                                                                                                                                                                                                                                                               |
|------------------------------------------------------------------------------------------------------------------------------------------------------------------------------------------------------------------------------------------------------------------------------|---------------------------------------------------------------------------------------------------------------------------------------------------------------------------------------------------------------------------------------------------------------------------------------------------------------------------------------------------------------|
| Full Name:                                                                                                                                                                                                                                                                   | Kathleen A Iles, MD                                                                                                                                                                                                                                                                                                                                           |
| Position/Title:                                                                                                                                                                                                                                                              | General Surgery Resident Physician, PGY-3                                                                                                                                                                                                                                                                                                                     |
| Institution/Organization:                                                                                                                                                                                                                                                    | University of North Carolina Hospitals                                                                                                                                                                                                                                                                                                                        |
| Mailing Address:                                                                                                                                                                                                                                                             | 101 Manning Drive, Chapel Hill, NC 27514                                                                                                                                                                                                                                                                                                                      |
| Telephone:                                                                                                                                                                                                                                                                   | 315-415-9032                                                                                                                                                                                                                                                                                                                                                  |
| Email:                                                                                                                                                                                                                                                                       | kathleen.iles@unchealth.unc.edu                                                                                                                                                                                                                                                                                                                               |
| Type of organization:                                                                                                                                                                                                                                                        | <input type="checkbox"/> For-profit <input checked="" type="checkbox"/> Not-for-profit <input type="checkbox"/> Other, <i>please specify</i> :                                                                                                                                                                                                                |
| <b>INTENDED USE (Select all that apply):</b>                                                                                                                                                                                                                                 |                                                                                                                                                                                                                                                                                                                                                               |
| <input checked="" type="checkbox"/> Reprint                                                                                                                                                                                                                                  | <i>Provide publication details:</i> Journal of Burn Care & Research                                                                                                                                                                                                                                                                                           |
| <input checked="" type="checkbox"/> Research study/clinical trial                                                                                                                                                                                                            | <i>Expected duration of study:</i> Start date _____ End date _____<br><i>Describe use in study:</i> Retrospective cohort study examining pre-admission frailty in elderly burn population<br><i>Is research sponsored or funded by pharma or industry?</i> <input type="checkbox"/> Y <input checked="" type="checkbox"/> N<br><i>If yes, please specify:</i> |
| <input type="checkbox"/> Routine clinical care                                                                                                                                                                                                                               | <i>Will the CFS be incorporated into an electronic medical/health record (EMR)?</i> <input type="checkbox"/> Y <input type="checkbox"/> N<br><i>If yes, please identify whether an EMR company is involved (e.g., Epic, Meditech):</i>                                                                                                                        |
| <input type="checkbox"/> Other                                                                                                                                                                                                                                               | <i>Specify:</i>                                                                                                                                                                                                                                                                                                                                               |
| Are you planning to translate the CFS? <input type="checkbox"/> Y <input checked="" type="checkbox"/> N <i>If yes, specify language(s):</i><br><i>We request editable (e.g. MSWord) copies of all translations. We do not independently verify or validate translations.</i> |                                                                                                                                                                                                                                                                                                                                                               |
| Are you planning any commercial development that would incorporate the CFS?<br><input type="checkbox"/> Y <input checked="" type="checkbox"/> N <i>If yes, please specify:</i>                                                                                               |                                                                                                                                                                                                                                                                                                                                                               |
| <b>By your signature below, you attest that you understand the conditions under which permission is granted.</b>                                                                                                                                                             |                                                                                                                                                                                                                                                                                                                                                               |
| Signature:                                                                                                                                                                                                                                                                   |                                                                                                                                                                                                                                                                            |
| Date:                                                                                                                                                                                                                                                                        | 1/22/2021                                                                                                                                                                                                                                                                                                                                                     |
| <b>Send completed, signed form by fax or email to:</b>                                                                                                                                                                                                                       | <b>Geriatric Medicine Research</b><br>1421-5955 Veterans' Memorial Lane, Halifax, NS B3H 2E1 Canada<br>Fax: 1-902-473-1050   Email: <a href="mailto:gmru@dal.ca">gmru@dal.ca</a>                                                                                                                                                                              |
| Approved by: _____                                                                                                                                                                                                                                                           | Date: 2021 JAN 25                                                                                                                                                                                                                                                                                                                                             |
| Developer or Designated Authority                                                                                                                                                                                                                                            |                                                                                                                                                                                                                                                                                                                                                               |

<sup>1</sup>A copy of the CFS will be sent to the user upon review and approval of this permission form. Valid only when signed by all parties.
